# Supplementary material
Source: PubMed Central journal article supplement (PMC6391060)
Supplement: NIHMS1009315-supplement-Electronic_Supplementary_Material.pdf [file NIHMS1009315-supplement-Electronic_Supplementary_Material.pdf]

## Electronic Supplementary Material

### Ferumoxytol Is Not Retained in Kidney Allografts in Patients Undergoing Acute Rejection

#### Journal: Molecular Imaging and Biology

Maryam Aghighi<sup>1</sup>, Laura Pisani<sup>1</sup>, Ashok J. Theruvath<sup>1</sup>, Anne M. Muehe<sup>1</sup>, Jessica Donig<sup>1</sup>,  
Ramsha Khan<sup>1</sup>, Samantha J. Holdsworth<sup>1</sup>, Neeraja Kambham<sup>2</sup>, Waldo Concepcion<sup>3</sup>, Paul C.  
Grimm<sup>4</sup>, Heike E. Daldrup-Link<sup>1\*</sup>.

#### Affiliations:

<sup>1</sup> Department of Radiology, Pediatric Molecular Imaging Program at Stanford (@PedsMIPS),  
Stanford University School of Medicine, Stanford, CA, USA

<sup>2</sup> Department of Pathology, Stanford University, Stanford, CA, USA

<sup>3</sup> Department of Surgery, Stanford University, Stanford, CA, USA.

<sup>4</sup> Department of Pediatrics, Stanford University, Stanford, CA, USA.

#### Corresponding author:

Heike E. Daldrup-Link\*, MD, PhD. H.E.Daldrup-Link@stanford.edu

\*Department of Radiology, Lucile Packard Children's Hospital, Stanford School of Medicine,  
725 Welch Rd, Stanford, CA 94305-5654, Ph (lab): (650)723-1127, fax: (650) 725-8957

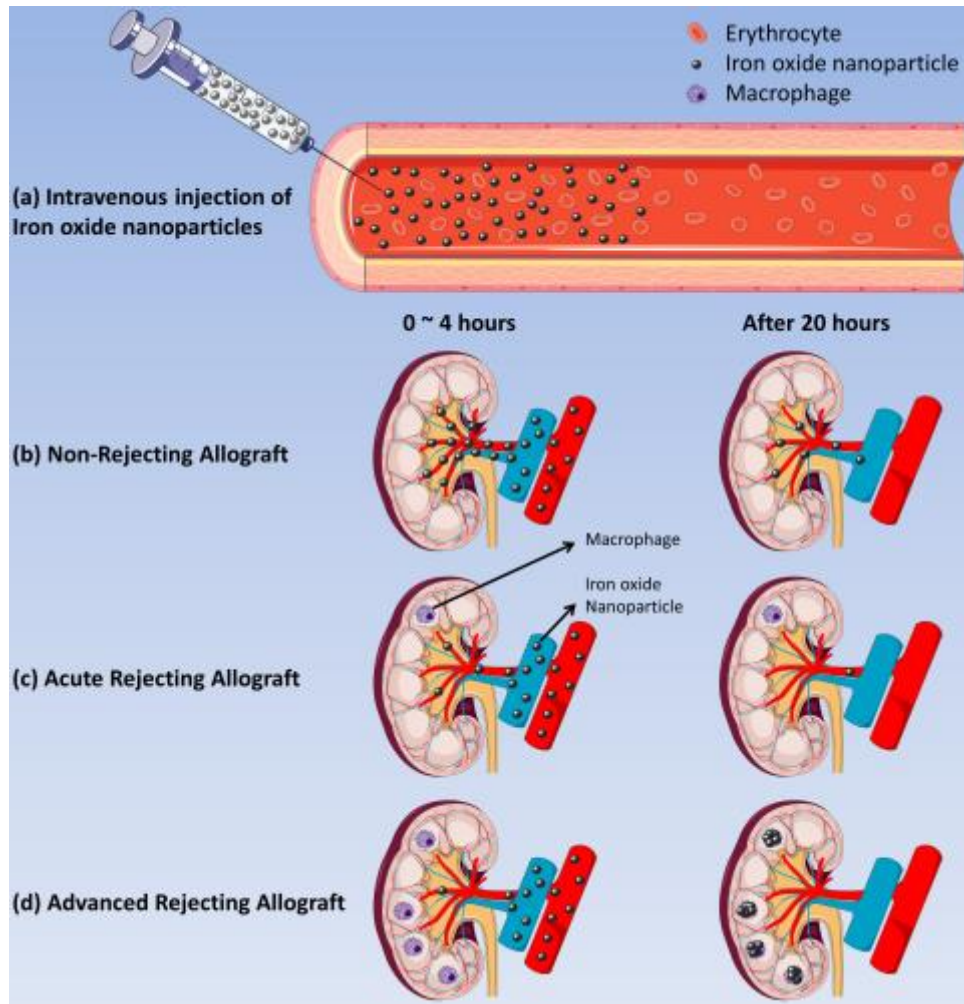

Figure S1: Schematic of Iron Oxide Nanoparticle (IONP) Pharmacokinetics in Renal Allografts: **a** Intravenous injection of IONPs, **b** Non-rejecting allograft: Intravascular IONPs causes perfusion-dependent organ enhancement at 4 h post injection (p.i.), which slightly decreases at 20 h p.i., **c** Early rejection with few macrophages: Reduced organ perfusion at 4 h p.i. and insignificant IONP retention at 20 h p.i. **d** Advanced rejection with marked macrophage infiltration: Reduced organ perfusion at 4 h p.i. and significant IONP retention in prevalent macrophages at 20 h p.i.

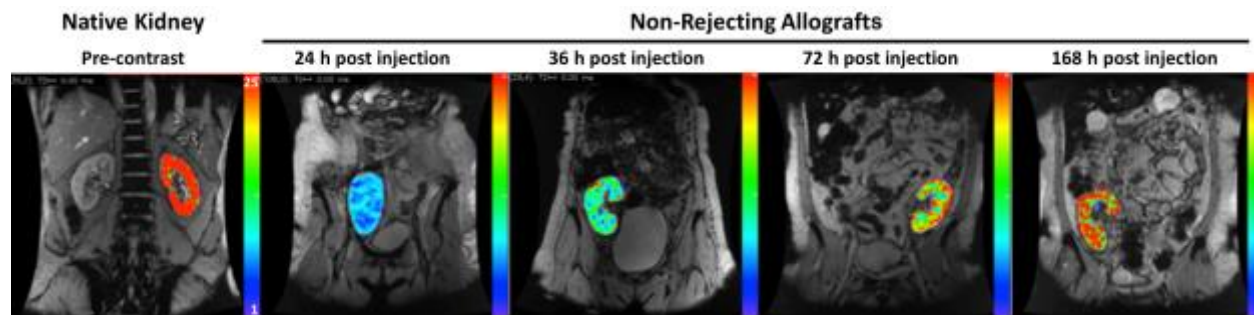

Figure S2: T2\* relaxation time maps, superimposed on coronal T2\*-weighted SPGR images of native kidney without ferumoxytol and non-rejecting allografts at progressing time points after intravenous injection of ferumoxytol.
